# Supplementary material
Source: PubMed Central journal article supplement (PMC524447)
Supplement: pnas_101_43_15410__1.pdf [file pnas_101_43_15410__1.pdf]

grains per nucleus

20 40 60 80 100 120 140 160

Fusion with CS-A cells

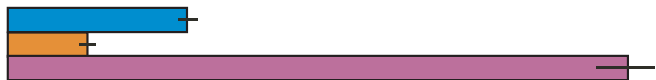

Subpopulations

% of normal<sup>a</sup>

UVS1KO unfused

$37 \pm 5$  (n=45<sup>b</sup>)

CS3BE unfused

$18 \pm 3$  (n=45)

Heterokaryons

$127 \pm 16$  (n=50)

Fusion with CS-B cells

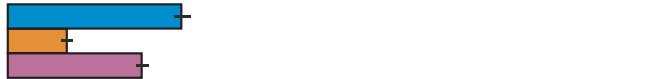

UVS1KO unfused

$37 \pm 6$  (n=25)

CS1AN unfused

$14 \pm 3$  (n=25)

Heterokaryons

$29 \pm 5$  (n=50)

Fusion with UV<sup>S</sup> cells

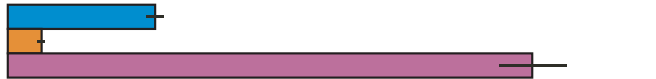

UVS1KO unfused

$32 \pm 3$  (n=25)

Kps3 unfused

$9 \pm 2$  (n=25)

Heterokaryons

$109 \pm 16$  (n=50)

Normal cells

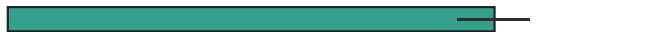

VH10 unfused

100 (n=45)
